# Supplementary material
Source: Springer Nature journal article supplement (https://www.springermedizin.de/resource/supplementary/12985_2008_377_MOESM1_ESM.pdf/9607946)

### Domain III

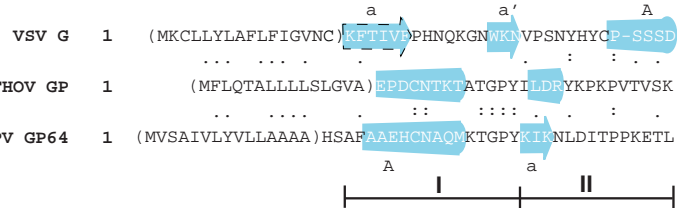

### Domain I

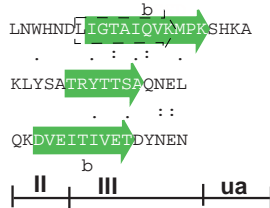

### Domain II

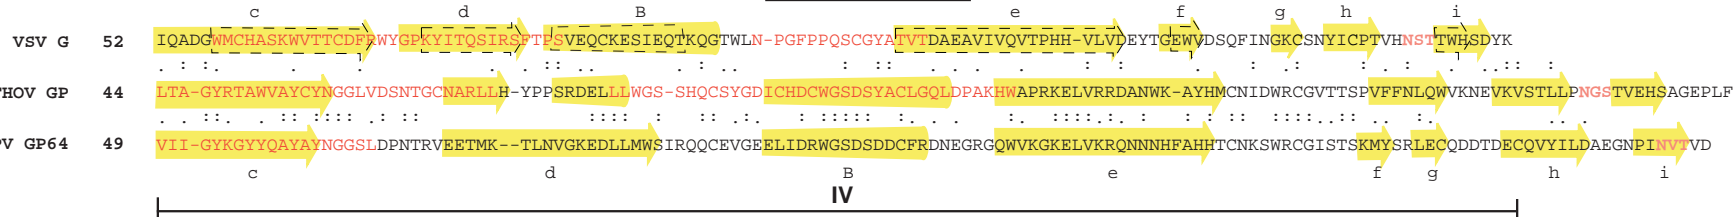

### Domain I

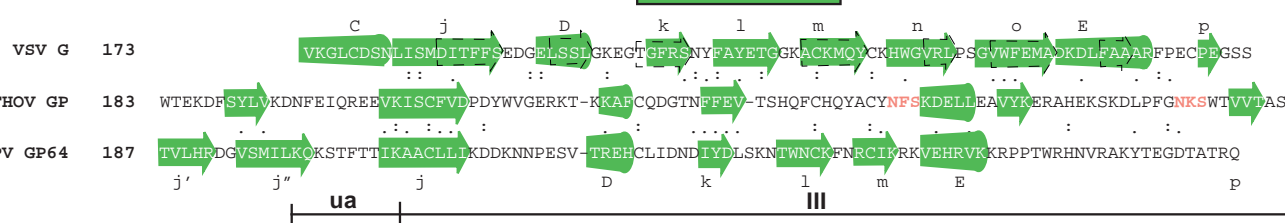

### Domain III

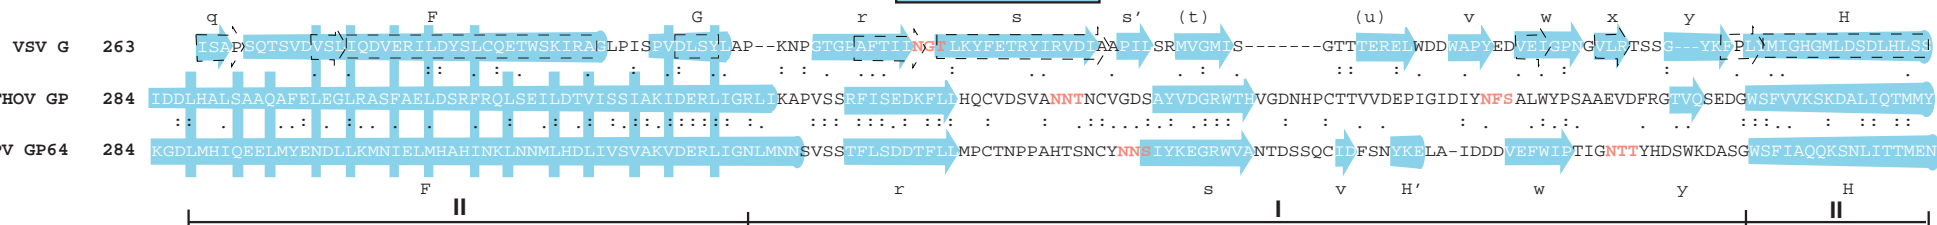

### Stem

### Transmembrane Domain

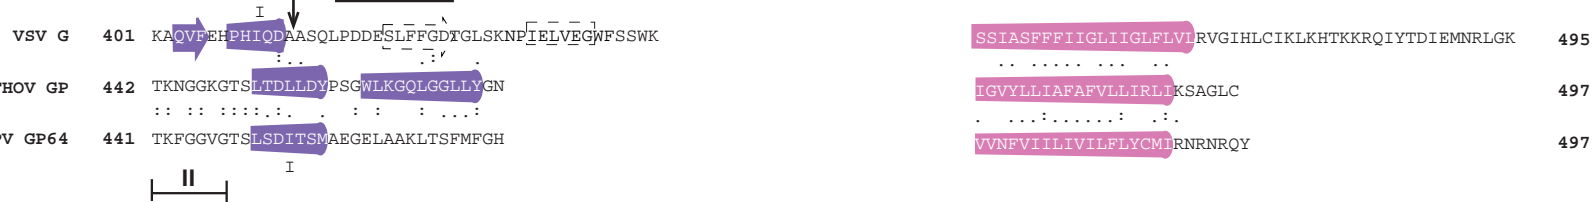

Supplement: MOESM1 [file 9607946]
